# Supplementary material
Source: PubMed Central journal article supplement (PMC4023349)
Supplement: NIHMS575114-supplement-Supplementary_data.pdf [file NIHMS575114-supplement-Supplementary_data.pdf]

**Table S1. Primer Sequences for In Vitro ChIP from p208 ML-p53 Template, Related to Experimental Procedures**

---

|                     | Forward primers        | Reverse primers        |
|---------------------|------------------------|------------------------|
| p53 binding site    | TGAGGAAAGGAGAGTAGGGTG  | ATGCTGGCCTAGAGAACATG   |
| Major late promoter | TGAGGAAAGGAGAGTAGGGTG  | GCTCTAGAGTGTTCCCTGAAGG |
| 5S nucleosome       | CAAGTACTAACCGAGCCCTATG | CAAGAGCCTACGACCATACC   |

---
